# Supplementary material for: Intra- and Inter-Frequency Brain Network Structure in Health and Schizophrenia
Source: PubMed Central journal article supplement (PMC3753323; doi:10.1371/journal.pone.0072351), 2013-08-26
Supplement: pone.0072351.s007.pdf [file pone.0072351.s007.pdf]

Table 1: Duration of Illness and PANSS scores

|                            | S1        | S2        | S3        | S4        | S5        | S6        | S7        | S8        | S9        | S10       | S11       | S12       | S13       | S14       |
|----------------------------|-----------|-----------|-----------|-----------|-----------|-----------|-----------|-----------|-----------|-----------|-----------|-----------|-----------|-----------|
| <i>Duration (years)</i>    | 5         | 5         | 9         | 26        | 6         | 7         | 6         | 5         | 10        | 20        | 14        | 31        | 13        | 21        |
| <i>Positive Symptoms</i>   |           |           |           |           |           |           |           |           |           |           |           |           |           |           |
| Delusions                  | 4         | 1         | 4         | 1         | 3         | 1         | 2         | 2         | 5         |           | 3         | 1         | 1         | 1         |
| Conceptual                 | 3         | 5         | 1         | 5         | 1         | 1         | 1         | 1         | 3         | 5         | 2         | 1         | 6         | 1         |
| Hallucinatory              | 5         | 1         | 5         | 3         | 1         | 1         | 1         | 4         | 1         | 1         | 7         | 5         | 5         | 3         |
| Excitement                 | 2         | 1         | 1         |           | 1         | 1         | 1         | 1         | 2         | 1         | 2         | 1         | 1         | 1         |
| Grandiosity                | 1         | 1         | 1         | 1         | 1         | 1         | 1         | 4         | 3         | 1         | 7         | 1         | 1         | 1         |
| Suspiciousness             | 3         | 4         | 3         | 1         | 3         | 1         | 1         | 3         | 3         | 6         |           | 6         | 4         | 3         |
| Hostility                  | 1         | 1         | 1         | 1         | 1         | 1         | 1         | 1         | 3         | 4         | 1         | 6         | 4         | 1         |
| <b>Sum</b>                 | <b>19</b> | <b>14</b> | <b>16</b> | <b>12</b> | <b>11</b> | <b>7</b>  | <b>8</b>  | <b>16</b> | <b>20</b> | <b>18</b> | <b>22</b> | <b>21</b> | <b>22</b> | <b>11</b> |
| <i>Negative Symptoms</i>   |           |           |           |           |           |           |           |           |           |           |           |           |           |           |
| Blunted affect             | 4         | 6         | 3         | 4         | 5         | 1         | 1         | 1         | 2         |           | 3         | 1         | 4         | 4         |
| Emotional withdrawal       | 4         | 6         | 3         | 4         | 4         | 1         | 4         | 1         | 3         |           | 3         | 3         | 5         | 4         |
| Poor rapport               | 4         | 5         | 2         | 4         | 4         | 1         | 1         | 1         | 6         |           | 2         | 1         | 4         | 3         |
| Passiveness                | 4         | 6         | 3         | 4         | 4         | 1         | 4         | 1         | 2         |           | 2         | 3         | 3         | 3         |
| Abstract thinking          | 4         | 1         | 2         | 5         | 5         | 1         | 1         | 1         | 3         |           | 6         | 1         | 6         | 1         |
| Lack of Spontaneity        | 4         | 7         | 3         | 5         | 4         | 1         | 1         | 1         | 2         |           | 4         | 1         | 6         | 3         |
| Stereotyped thinking       | 2         | 1         | 1         | 1         | 1         | 1         | 1         | 1         | 2         |           | 1         | 1         | 1         | 1         |
| <b>Sum</b>                 | <b>26</b> | <b>32</b> | <b>17</b> | <b>27</b> | <b>27</b> | <b>7</b>  | <b>13</b> | <b>7</b>  | <b>20</b> | <b>0</b>  | <b>21</b> | <b>11</b> | <b>29</b> | <b>19</b> |
| <i>General Symptoms</i>    |           |           |           |           |           |           |           |           |           |           |           |           |           |           |
| Somatic                    | 2         | 1         | 2         | 1         | 1         | 1         | 1         | 6         | 1         | 4         | 2         | 5         | 3         | 4         |
| Anxiety                    | 1         | 1         | 3         | 1         | 3         | 2         | 4         | 1         | 3         | 5         | 7         | 6         | 1         | 6         |
| Guilt                      | 1         | 1         | 2         | 1         | 3         | 1         | 1         | 1         | 6         | 1         | 1         | 5         | 1         | 4         |
| Tension                    | 1         | 1         | 3         | 1         | 3         | 2         | 1         | 1         | 2         | 4         | 1         | 2         | 1         | 4         |
| Mannerisms                 | 1         | 4         | 1         | 1         | 1         | 1         | 1         | 1         | 1         | 1         | 1         | 1         | 1         | 1         |
| Depression                 | 5         | 3         | 3         | 1         | 1         | 1         | 1         | 1         | 5         | 3         | 1         | 6         | 1         | 2         |
| Motor retardation          | 4         | 5         | 1         | 3         | 1         | 2         | 1         | 1         | 1         | 4         | 2         | 1         | 3         | 1         |
| Uncooperativeness          | 1         | 1         | 1         | 1         | 1         | 1         | 1         | 1         | 6         | 3         | 1         | 1         | 1         | 1         |
| Unusual thoughts           | 4         | 1         | 3         | 3         | 2         | 1         | 1         | 6         | 2         | 5         | 7         | 1         | 1         | 4         |
| Disorientation             | 1         | 1         | 1         | 1         | 1         | 1         | 5         | 1         | 1         | 1         | 1         | 1         | 1         | 1         |
| Poor attention             | 3         | 1         | 3         | 1         | 4         | 2         | 1         | 1         | 2         | 1         | 1         | 1         | 1         | 1         |
| Lack of judgment           | 4         | 5         | 2         | 4         | 1         | 1         | 1         | 1         | 7         | 5         | 5         | 1         | 4         | 5         |
| Disturbed volition         | 2         | 1         | 3         | 1         | 4         | 1         | 1         | 1         | 3         | 1         | 1         | 5         | 4         | 1         |
| Poor impulse control       | 1         | 1         | 2         | 1         | 1         | 1         | 1         | 1         | 3         | 1         | 1         | 1         | 1         | 1         |
| Preoccupation              | 4         | 4         | 2         | 1         | 1         | 1         | 1         | 2         | 2         | 6         | 7         | 1         | 1         | 5         |
| Social avoidance           | 3         | 5         | 3         | 1         | 3         | 2         | 1         | 1         | 2         | 5         | 1         | 5         | 1         | 1         |
| <b>Sum</b>                 | <b>38</b> | <b>36</b> | <b>35</b> | <b>23</b> | <b>31</b> | <b>21</b> | <b>23</b> | <b>27</b> | <b>47</b> | <b>50</b> | <b>40</b> | <b>43</b> | <b>26</b> | <b>42</b> |
| <i>Additional Symptoms</i> |           |           |           |           |           |           |           |           |           |           |           |           |           |           |
| Anergia                    | 13        | 18        | 8         | 12        | 11        | 5         | 11        | 4         | 7         |           | 9         | 6         | 13        | 10        |
| Thought Disturbance        | 13        | 8         | 10        | 12        | 5         | 4         | 4         | 15        | 9         | 12        | 23        | 8         | 13        | 9         |
| Activation                 | 4         | 6         | 5         |           | 5         | 4         | 3         | 3         | 5         | 6         | 4         | 4         | 3         | 6         |
| Paranoid/Belligerence      | 5         | 6         | 5         | 3         | 5         | 3         | 3         | 5         | 12        | 13        |           | 13        | 9         | 5         |
| Depression                 | 9         | 6         | 10        | 4         | 8         | 5         | 7         | 9         | 15        | 13        | 11        | 22        | 6         | 16        |
