# Supplementary material for: Intra- and Inter-Frequency Brain Network Structure in Health and Schizophrenia
Source: PubMed Central journal article supplement (PMC3753323; doi:10.1371/journal.pone.0072351), 2013-08-26
Supplement: pone.0072351.s008.pdf [file pone.0072351.s008.pdf]

Table 1: Medication Profile of Patient Group. Values are given in units of milligrams per day.

|              | S1 | S2 | S3  | S4 | S5  | S6 | S7 | S8  | S9 | S10 | S11 | S12 | S13 | S14 |
|--------------|----|----|-----|----|-----|----|----|-----|----|-----|-----|-----|-----|-----|
| Zyprexa      | 15 |    |     |    |     | 20 | 20 |     |    | 30  |     |     |     |     |
| Aripiprazole |    | 30 | 10  |    |     |    |    | 30  |    |     | 15  |     |     |     |
| Clozapine    |    |    |     |    | 300 |    |    |     |    |     |     |     | 350 | 600 |
| Haldol       | 15 |    |     |    |     |    |    |     |    |     |     |     |     |     |
| Cogentin     | 5  |    | 2   |    |     |    |    |     |    |     |     |     |     |     |
| Lithium      |    |    | 600 |    |     |    |    |     |    |     |     |     |     |     |
| Ambien       |    |    | 5   |    |     |    |    |     |    |     |     |     |     |     |
| Geodon       |    |    | 160 |    |     |    |    |     |    |     |     |     |     |     |
| Prozac       |    |    |     |    | 20  |    |    |     |    |     |     |     |     |     |
| Paxil        |    |    |     |    |     |    |    | 25  |    |     |     |     |     |     |
| Seroquel     |    |    |     |    |     |    |    | 800 |    |     |     |     |     |     |
| Zoloft       |    |    |     |    |     |    |    |     |    | 100 |     |     |     |     |
| Ativan       |    |    |     |    |     |    |    |     |    | 1.5 |     |     |     |     |
| Ambien       |    |    |     |    |     |    |    |     |    | 10  |     | 10  |     |     |
| Risperdal    |    |    |     |    |     |    |    |     |    |     | 2.5 |     |     |     |
| Geodon       |    |    |     |    |     |    |    |     |    |     | 160 |     |     |     |
| Luvox        |    |    |     |    |     |    |    |     |    |     | 150 |     |     |     |
| Remeron      |    |    |     |    |     |    |    |     |    |     |     | 90  |     |     |
| Valium       |    |    |     |    |     |    |    |     |    |     |     | 30  |     |     |
| Klonopin     |    |    |     |    |     |    |    |     |    |     |     |     |     | 4   |
| Thorazin     |    |    |     |    |     |    |    |     |    |     |     |     |     | 400 |
